# Supplementary material for: Characterization, Biocompatibility and Antioxidant Activity of Hydrogels Containing Propolis Extract as an Alternative Treatment in Wound Healing
Source: MDPI journal article supplement (doi:10.3390/ph17050575), 2024-04-30

## Supplementary material

**Table S1:** Chemical shifts and multiplicities observed in the  $^{13}\text{C}$  NMR spectrum of propolis extract.

| RMN $^{13}\text{C}$           |              |                                                                            |             |
|-------------------------------|--------------|----------------------------------------------------------------------------|-------------|
| Chemical shift $\delta$ (ppm) | Multiplicity | Type of carbon                                                             | Class       |
| 14.40                         | Singlet      | R-CH <sub>3</sub> , R <sub>2</sub> -CH <sub>2</sub> and R <sub>3</sub> -CH | Hydrocarbon |
| 16.56                         | Singlet      | R-CH <sub>3</sub> , R <sub>2</sub> -CH <sub>2</sub> and R <sub>3</sub> -CH | Hydrocarbon |
| 17.97                         | Singlet      | R-CH <sub>3</sub> , R <sub>2</sub> -CH <sub>2</sub> and R <sub>3</sub> -CH | Hydrocarbon |
| 18.20                         | Singlet      | R-CH <sub>3</sub> , R <sub>2</sub> -CH <sub>2</sub> and R <sub>3</sub> -CH | Hydrocarbon |
| 19.52                         | Singlet      | R-CH <sub>3</sub> , R <sub>2</sub> -CH <sub>2</sub> and R <sub>3</sub> -CH | Hydrocarbon |
| 21.42                         | Singlet      | R-CH <sub>3</sub> , R <sub>2</sub> -CH <sub>2</sub> and R <sub>3</sub> -CH | Hydrocarbon |
| 22.55                         | Singlet      | R-CH <sub>3</sub> , R <sub>2</sub> -CH <sub>2</sub> and R <sub>3</sub> -CH | Hydrocarbon |
| 23.83                         | Singlet      | R-CH <sub>3</sub> , R <sub>2</sub> -CH <sub>2</sub> and R <sub>3</sub> -CH | Hydrocarbon |
| 24.95                         | Singlet      | R-CH <sub>3</sub> , R <sub>2</sub> -CH <sub>2</sub> and R <sub>3</sub> -CH | Hydrocarbon |
| 25.92                         | Singlet      | R-CH <sub>3</sub> , R <sub>2</sub> -CH <sub>2</sub> and R <sub>3</sub> -CH | Hydrocarbon |
| 27.23                         | Singlet      | R-CH <sub>3</sub> , R <sub>2</sub> -CH <sub>2</sub> and R <sub>3</sub> -CH | Hydrocarbon |
| 28.35                         | Singlet      | R-CH <sub>3</sub> , R <sub>2</sub> -CH <sub>2</sub> and R <sub>3</sub> -CH | Hydrocarbon |
| 29.48                         | Singlet      | R-CH <sub>3</sub> , R <sub>2</sub> -CH <sub>2</sub> and R <sub>3</sub> -CH | Hydrocarbon |
| 31.76                         | Singlet      | R-CH <sub>3</sub> , R <sub>2</sub> -CH <sub>2</sub> and R <sub>3</sub> -CH | Hydrocarbon |
| 33.82                         | Singlet      | R-CH <sub>3</sub> , R <sub>2</sub> -CH <sub>2</sub> and R <sub>3</sub> -CH | Hydrocarbon |
| 34.12                         | Singlet      | R-CH <sub>3</sub> , R <sub>2</sub> -CH <sub>2</sub> and R <sub>3</sub> -CH | Hydrocarbon |
| 37.10                         | Singlet      | R-CH <sub>3</sub> , R <sub>2</sub> -CH <sub>2</sub> and R <sub>3</sub> -CH | Hydrocarbon |
| 39.29-40.54                   | Septet       | DMSO                                                                       |             |
| 63.65                         | Singlet      | C $\equiv$ C                                                               | Alkyne      |
| 65.94                         | Singlet      | C $\equiv$ C                                                               | Alkyne      |
| 67.33                         | Singlet      | C $\equiv$ C                                                               | Alkyne      |
| 70.50                         | Singlet      | C $\equiv$ C                                                               | Alkyne      |
| 71.02                         | Singlet      | C $\equiv$ C                                                               | Alkyne      |
| 72.,3                         | Singlet      | C $\equiv$ C                                                               | Alkyne      |
| 73.01                         | Singlet      | C $\equiv$ C                                                               | Alkyne      |
| 77.31                         | Singlet      | C-OH                                                                       | Alkyne      |
| 115.43                        | Singlet      | C=C                                                                        | Alkyne      |
| 124.57                        | Singlet      | C=C                                                                        | Alkyne      |
| 130.11                        | Singlet      | C=C                                                                        | Alkyne      |
| 132.08                        | Singlet      | C=C                                                                        | Alkyne      |

**Figure S1:**  $^1\text{H}$  NMR spectrum of propolis extract from the bee *Apis mellifera* L.

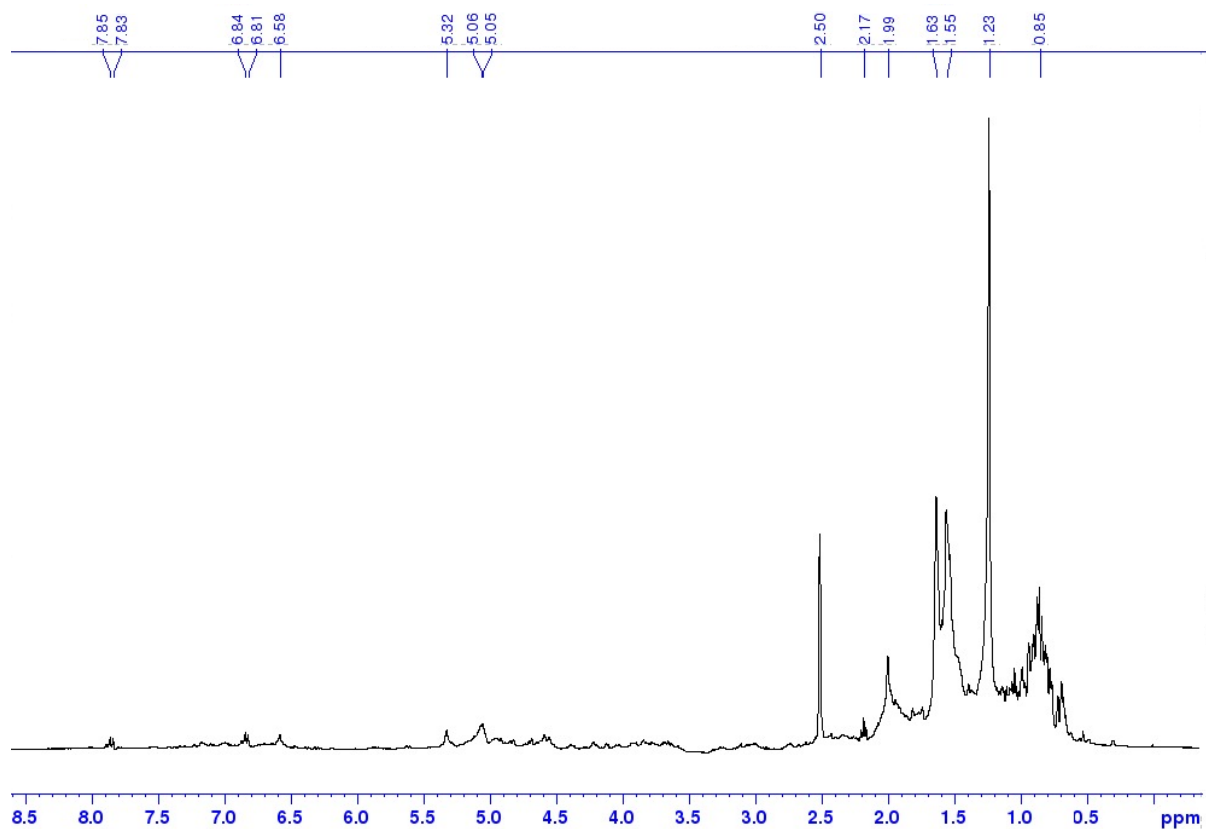

**Figure S2:**  $^{13}\text{C}$  NMR spectrum of propolis extract expanded in the regions between 132.08 and 14.40 ppm.

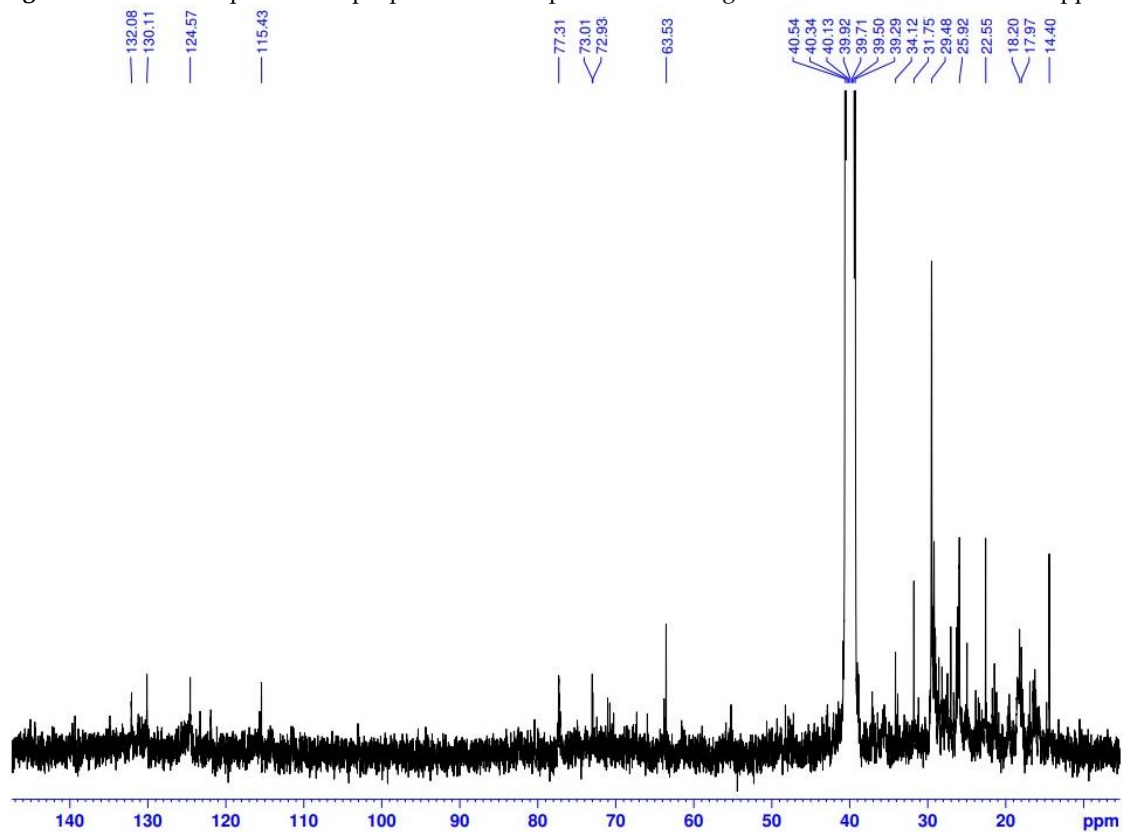

**Figure S3:** Expanded  $^{13}\text{C}$  NMR spectrum of *Apis mellifera* bee propolis extract between the regions of 40 to 14 ppm.

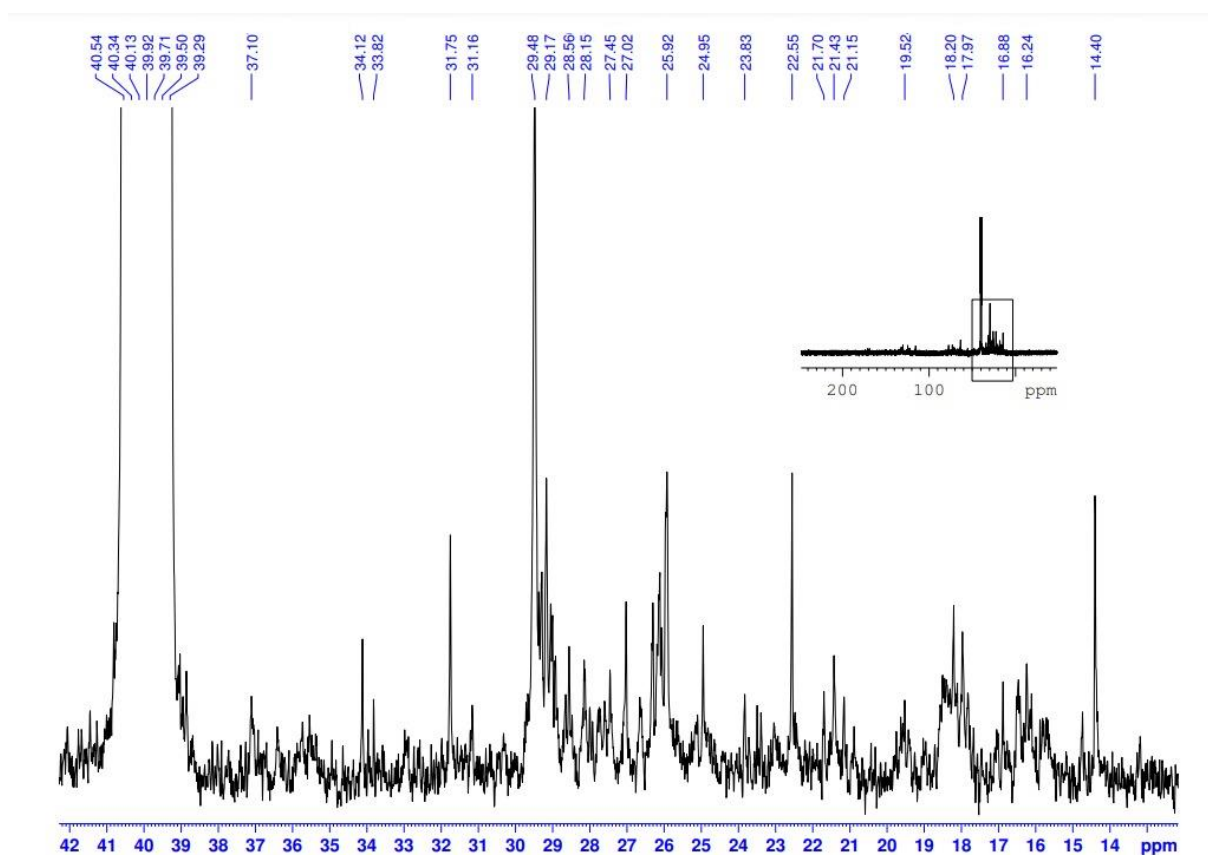

**Figure S4:** Expanded  $^{13}\text{C}$  NMR spectrum of *Apis mellifera* bee propolis extract between the regions of 77 to 63 ppm.

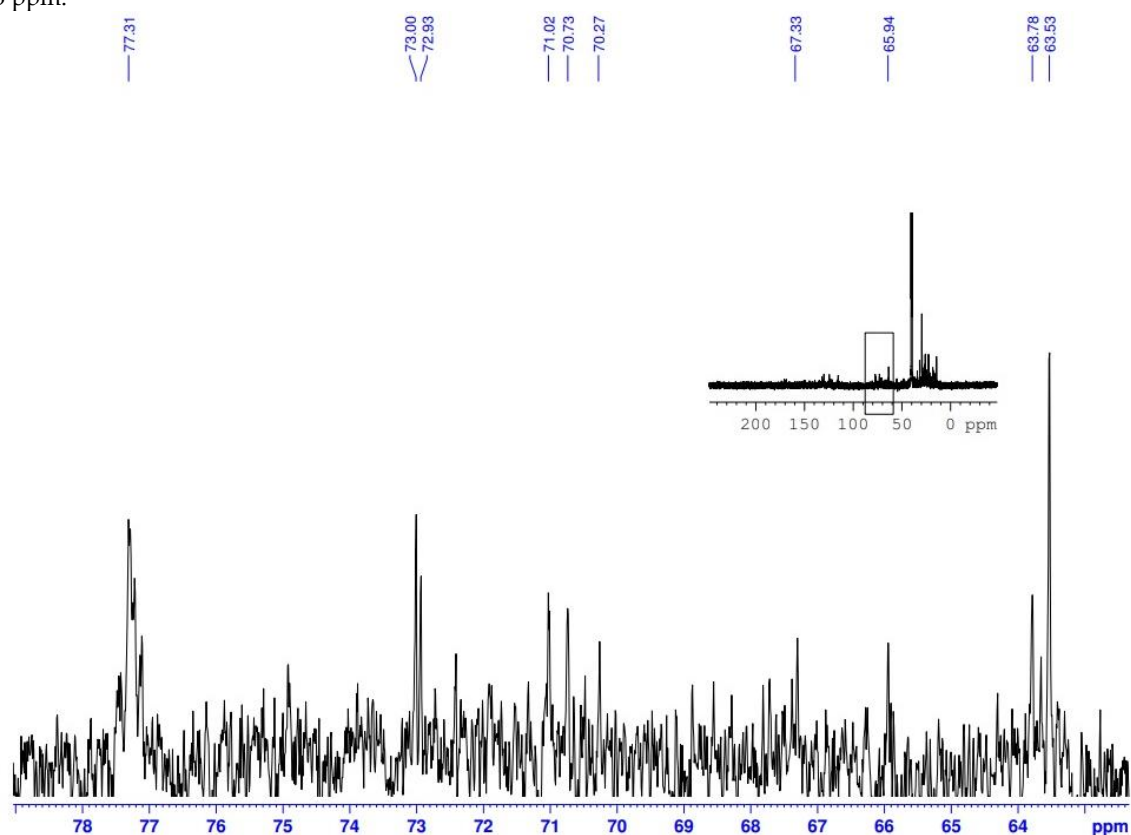

**Figure S5:** Expanded  $^{13}\text{C}$  NMR spectrum of propolis extract from the bee *Apis mellifera* between the regions of 132 to 115 ppm

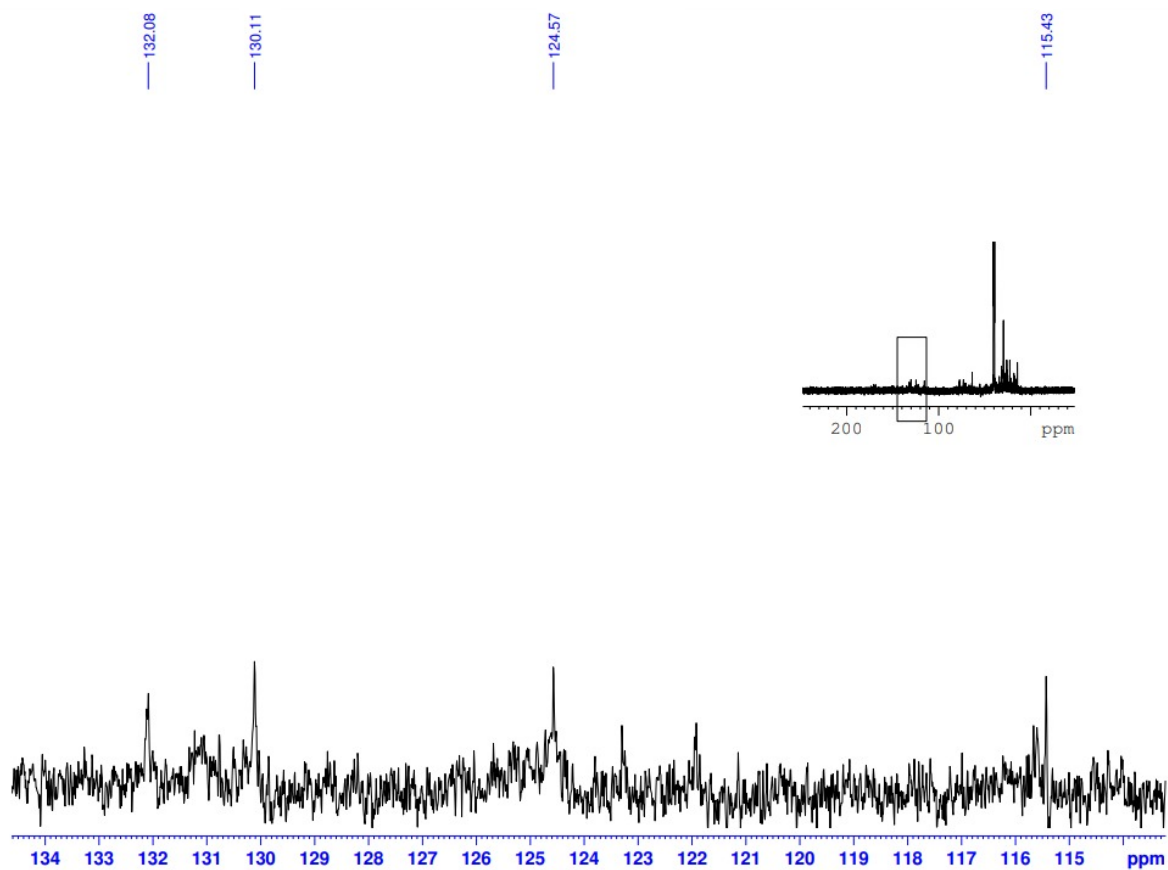

Supplement: s1 [file s1]
